# Supplementary material for: A Time Series Study for Effects of PM10 on Coronary Heart Disease in Ganzhou, China
Source: MDPI journal article supplement (doi:10.3390/ijerph20010086), 2022-12-21
Supplement: s1 [file s1]

## Supplementary Materials

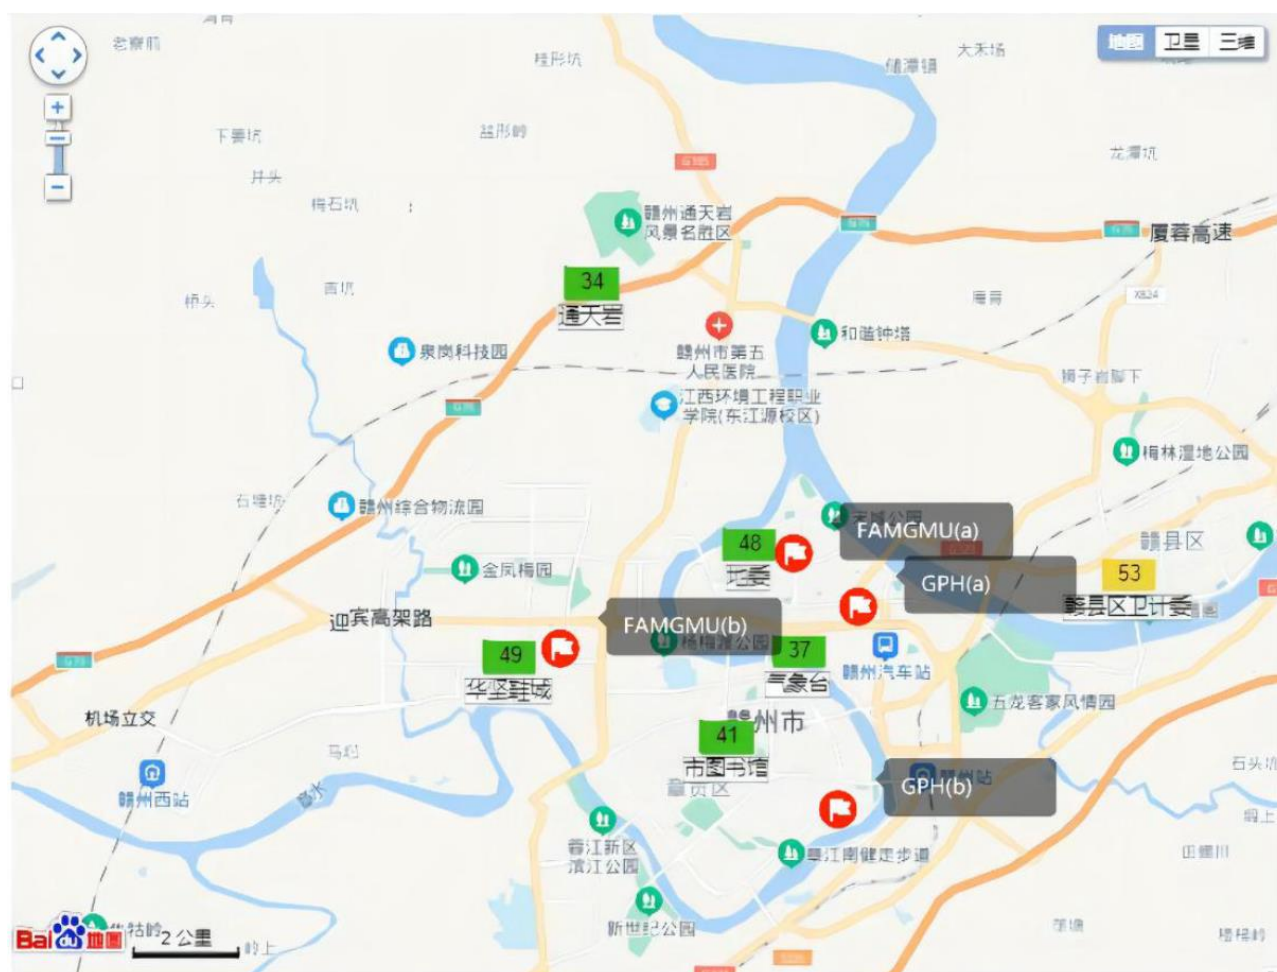

**Figure S1.** Distribution of meteorological monitoring stations and the hospital.

Notes: The green marks represent monitoring sites and the red flags represent hospitals; FAMGMU: The First Affiliated Hospital of Gannan Medical University; GPH: Ganzhou People's Hospital. a/b: Different hospital districts of the two hospitals.

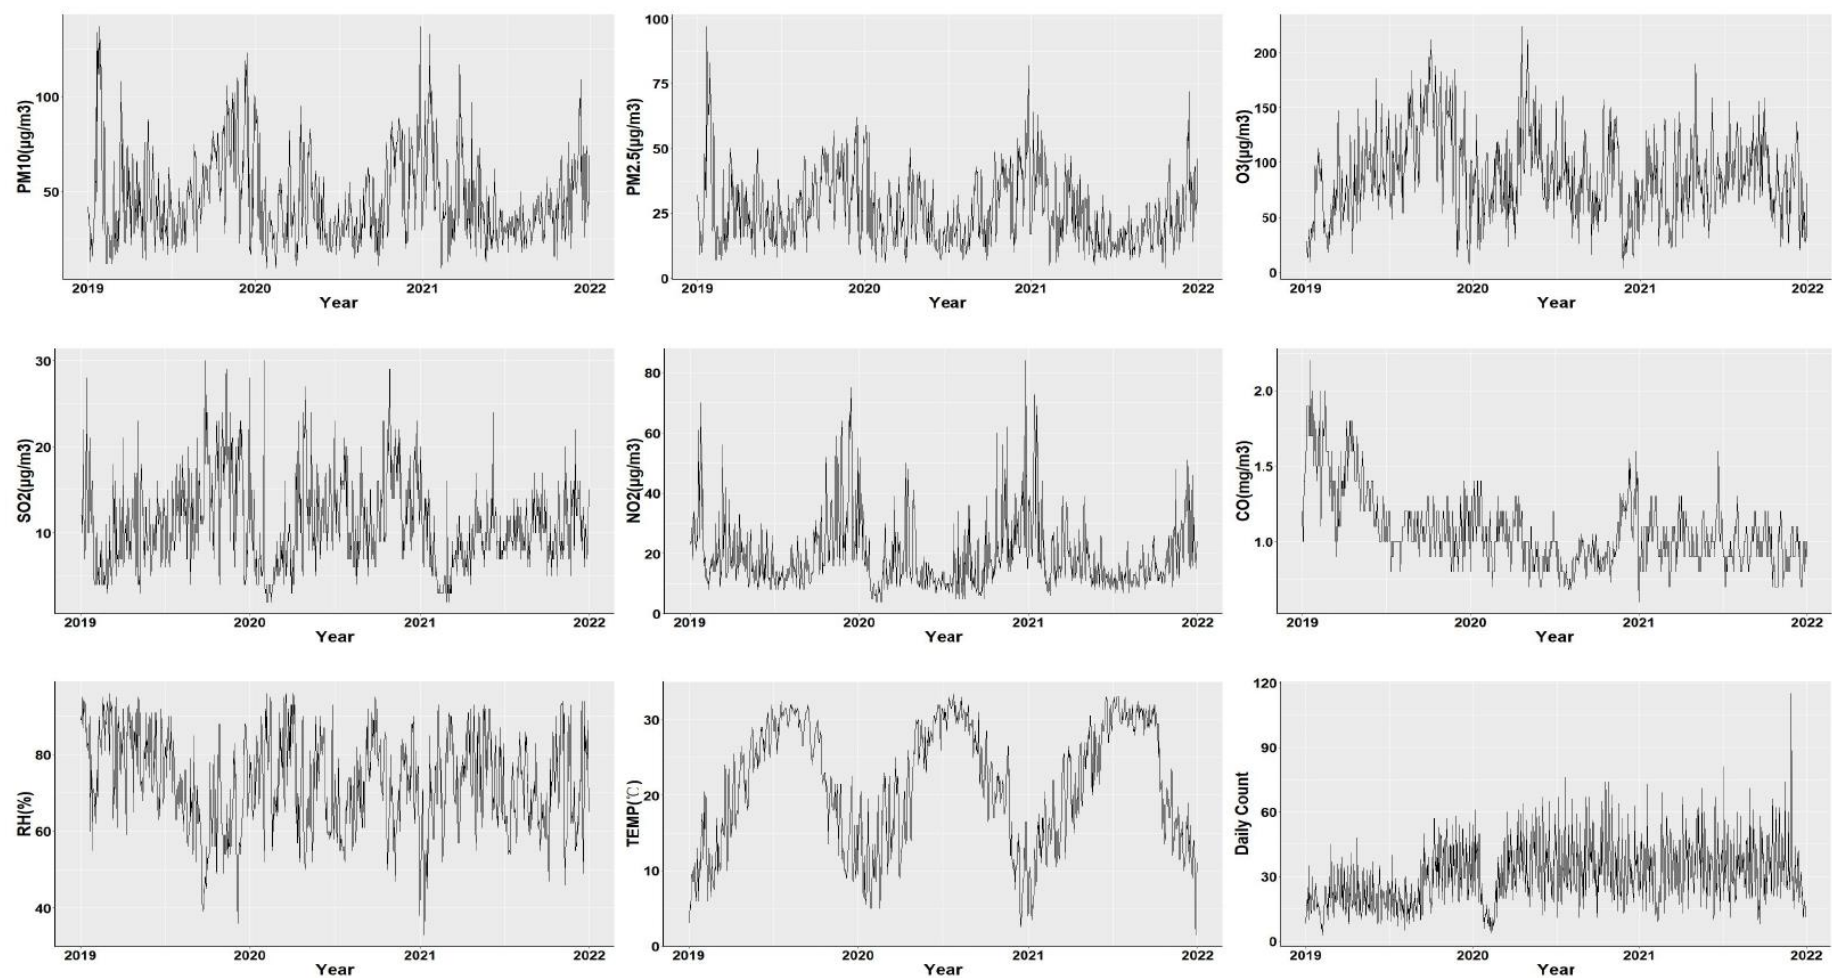

**Figure S2.** Time series graph to show the daily variation of CHD inpatients, concentrations of air pollutants and meteorological factors.

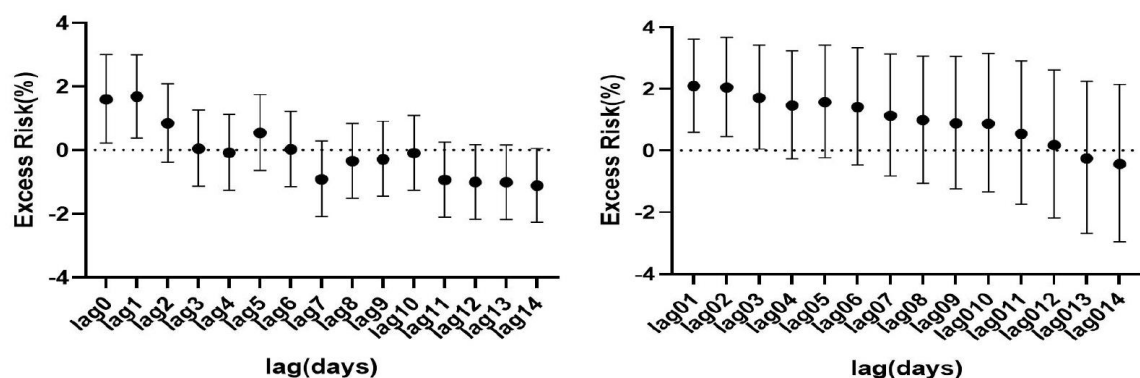

**Figure S3.** Sensitivity analyses showed the effect of PM<sub>10</sub> on single-day lag and cumulative lag effects on CHD hospitalizations from day0 to day14.

**Table S1.** Spearman's correlation between air pollutants and meteorological factors in Ganzhou during 2019–2021.

| Factors           | PM <sub>10</sub> | PM <sub>2.5</sub> | SO <sub>2</sub> | NO <sub>2</sub> | CO     | O <sub>3</sub> | Temperature | Relative humidity |
|-------------------|------------------|-------------------|-----------------|-----------------|--------|----------------|-------------|-------------------|
| PM <sub>10</sub>  | 1.00             | 0.95 *            | 0.55 *          | 0.67 *          | 0.18 * | 0.50 *         | −0.12 *     | −0.45 *           |
| PM <sub>2.5</sub> |                  | 1.00              | 0.47 *          | 0.62 *          | 0.26 * | 0.43 *         | −0.20 *     | −0.31 *           |
| SO <sub>2</sub>   |                  |                   | 1.00            | 0.40 *          | −0.03  | 0.44 *         | 0.23 *      | −0.48 *           |
| NO <sub>2</sub>   |                  |                   |                 | 1.00            | 0.28 * | 0.10 *         | −0.38 *     | −0.14 *           |
| CO                |                  |                   |                 |                 | 1.00   | −0.04          | −0.23 *     | 0.27 *            |
| O <sub>3</sub>    |                  |                   |                 |                 |        | 1.00           | 0.44 *      | −0.63 *           |
| Temperature       |                  |                   |                 |                 |        |                | 1.00        | −0.31 *           |
| Relative humidity |                  |                   |                 |                 |        |                |             | 1.00              |

\*  $p < 0.001$ .

**Table S2.** Effects of PM<sub>10</sub> on CHD hospitalization at different time, temperature and relative humidity *df* values.

| Variables         | <i>df</i> | AIC      | ER   | 95%CI       |
|-------------------|-----------|----------|------|-------------|
| Time              | 3         | 10379.58 | 2.74 | (1.50~4.00) |
|                   | 4         | 10271.01 | 2.19 | (0.92~3.47) |
|                   | 5         | 10194.56 | 1.86 | (0.58~3.16) |
|                   | 6         | 10200.45 | 1.95 | (0.67~3.25) |
|                   | 7         | 10173.31 | 1.86 | (0.57~3.16) |
|                   | 8*        | 10131.72 | 1.69 | (0.39~3.00) |
| Temperature       | 3         | 10138.31 | 1.68 | (0.39~2.99) |
|                   | 4*        | 10131.72 | 1.69 | (0.39~3.00) |
|                   | 5         | 10133.41 | 1.71 | (0.41~3.02) |
|                   | 6         | 10134.03 | 1.71 | (0.42~3.02) |
| Relative humidity | 3*        | 10131.72 | 1.69 | (0.39~3.00) |
|                   | 4         | 10131.72 | 1.69 | (0.39~3.00) |
|                   | 5         | 10131.72 | 1.69 | (0.39~3.00) |

ER means excess risk (%); All were statistically significant, \* represents the degrees of freedom used in this study.
